# Supplementary material for: The thorax of the cave cricket Troglophilus neglectus: anatomical adaptations in an ancient wingless insect lineage (Orthoptera: Rhaphidophoridae)
Source: BMC Evol Biol. 2016 Feb 18;16:39. doi: 10.1186/s12862-016-0612-5 (PMC4758143; doi:10.1186/s12862-016-0612-5)
Supplement: Additional file 2: — Thoracic muscles of different representatives of Polyneoptera homologized following nomenclature by [ 36 ]. (XLSX 21 kb) [file 12862_2016_612_MOESM2_ESM.xlsx]

## Sheet: Tabelle1
		Homologization by authors of present study						Homologization by Wipfler et al (2014)
	species muscle (Friedrich & Beutel, 2008)	Troglophilus neglectus (Rhaphidophoridae, wingless) (present study)	Conocephalus maculatus (Tettigoniidae, winged) (Maki, 1938)	Acheta domesticus (Gryllidae, winged) (Voss 1905, 1912)	Locusta migratoria migratorioides (Caelifera, winged) (Maki, 1938)	Locusta migratoria (Caelifera, winged) (Albrecht, 1953)	Atractomorpha sinensis (Caelifera, brachypterous) (Maki, 1938)	Megacrania tsudai (Phasmida, winged) (Maki, 1935)	Carausius morosus (Phasmida wingless) (Jeziorski, 1918)	Austrophasma caledonensis (Mantophasmatodea, wingless) (Wipfler et al, 2014)
PROTHORAX	Idlm1	+	1	0dlm2	1	49	1	?	?	+
Muscle	Idlm2	-	5	0dlm1	5, 6	47, 48	5	+	+	+
	Idlm3	+	-	odlm1a	2	56	2	-	-	+
	Idlm4	-	4	-	-	-	-	-	+	+
	Idlm5	+	2	Idlm3a, Idlm3b	3 (2 bdl), 4	58, 58a, 58b	3, 4	+	+	+
	Idlm6	-	3	-	-	-	-	-	-	-
	Idvm1	+	7	0dvmδ	11	52x	10	-	-	-
	Idvm2	+	9	0dvmγ	13	50	11	+	+	+
	Idvm3	+	10	0dvmβ	14	51	12	+	+	+
	Idvm4	-	-	0dvmα, 0dvmα'	-	-	-	+	+	+
	Idvm5	+	11?	0ism	-	53	-	-	+	+
	Idvm6	-	12	0ism2	15, 16	52, 52a	13, 14	-	-	+
	Idvm7	-	-	-	-	-	-	-	-	-
	Idvm8	-	-	-	-	-	-	-	-	-
	Idvm9	-	-	-	-	-	-	-	-	-
	Idvm10	+	13	Iism	17	59	15	+	+	+
	Idvm11	-	-	-	-	-	-	+	+	-
	Idvm12	-	-	-	-	-	-	-	-	-
	Idvm13	+	15	Idvm1 (1905) Idvm6 (1912)	20	62, 62a	17	+	+	+
	Idvm14	-	-	-	-	-	-	?	+	+
	Idvm15	-	-	-	-	-	-	+	+	+
	Idvm16	+ ?	18	Idvm2	22	63	20	+	+	+
	Idvm17	- ?	19	Idvm7	23	65	21	+	+	+
	Idvm18	+	20	Ipm6	24	64	22	+	+	+
	Idvm19	+	25	Idvm8, Ipm6a	30	71d	27	-	+	+
	Itpm1	-	-	0vlm5a	-	-	-	-	-	-
	Itpm2	-	-	0idvm1, 0idvm2	18	57	16	-	+	-
	Itpm3	-	-	-	-	-	-	+	-	+
	Itpm4	-	-	Ipm9, Ipm11, Ipm12	-	-	-	+	-	+
	Itpm5	-	-	-	-	-	-	-	-	-
	Itpm6	-	-	-	-	-	-	-	-	?
	Ispm1	-	14	Izm	19	-	(+)*	-	+	+
	Ispm2	-	34	-	-	-	-	+	+	+
	Ispm3	-	34?	-	-	-	-	-	-	?
	Ispm4	-	-	-	-	-	-	-	-	-
	Ispm5	+	-	-	-	-	-	+	+	-
	Ispm6	-	-	-	-	-	-	-	-	-
	Ispm7	-	-	-	-	-	-	-	-	-
	Ipcm1	-	-	-	-	-	-	-	-	-
	Ipcm2	+	16	0vlm2	-	-	-	-	-	-
	Ipcm3	-	-	Ipm5	-	-	18	+	-	-
	Ipcm4	+	23	Ipm4	28	68	26	+	+	+
	Ipcm5	+	24	?	29	68a	25	-	-	-
	Ipcm6	-	-	-	-	-	-	+	+	-
	Ipcm7	-	-	-	-	-	-	-	-	-
	Ipcm8	+ (2 bdl)	26, 27	Ipm4a, Idvm5	31, 32	71b, 71b	28	+	+	+
	Ivlm1	-	-	0vlm3	8, 9	-	7, 8	+	+	-
	Ivlm2	-	-	-	-	-	-	-	-	-
	Ivlm3	+	6	0vlm4, 0vlm5	7	55	6	+	+	+
	Ivlm4	+	8	Ivlm7	12	61	-	+	+	+
	Ivlm5	-	-	-	-	-	-	-	-	-
	Ivlm6	+	-	Ivlm6	-	-	-	-	-	+
	Ivlm7	+	31	Ivlm4, Ivlm5	37	60	32	-	-	+
	Ivlm8	+	32	Ivlm1	38	88	-	-	-	-
	Ivlm9	+	33	Ivlm3	39	87	33	-	-	-
	Iscm1	+ (3x)	17	Ibm1	21	?	19	+	+	+
	Iscm2	+	21	Ibm2	-	-	-	+	+	+
	Iscm3	+	22	Ibm3	27	69	24	+	+	+
	Iscm4	-	-	-	-	66?	-	-	-	+
	Iscm5	+	-	Ibm7	25, 26	67	23	-	-	-
	Iscm6	-	28	Ibm4	-	-	29	-	-	+
	Iscm7	+	43	Ivlm2	-	-	-	-	-	-
MESOTHORAX	IIdlm1	+	29	IIdlm1, IIdlm2	33	81	30	-	-	+
	IIdlm2	-	30	IIdlm3, IIdlm4	34, 35, 36	-	31	+	+	+
	IIdvm1	-	36	IIdvm7	40, 41, 42	83, 84	34, 35, 36	-	-	-
	IIdvm2	-	41	IIdvm1, IIdvm6	51	89	41	?	-	+
	IIdvm3	-	-	-	58?	-	-	+	+	+
	IIdvm4	+	45	IIdvm3+4	53	90	43	+	+	+
	IIdvm5	+	46	IIdvm2	54	91	44	+	+	+
	IIdvm6	+	47	IIpm6	55	99	45	+	+	+
	IIdvm7	+	54	IIdvm5	62	103b, 103c	52, 53	+	+	+
	IIdvm8	-	-	IIism	43	-	-	+	+	-
	IIdvm9	-	-	-	-	-	-	+	+	-
	IItpm1	-	-	IIpm10	44	-	-	-	-	+
	IItpm2	-	37	IIpm11	45	-	-	-	-	+
	IItpm3	-	-	-	-	-	-	-	-	+
	IItpm4	-	-	-	-	-	-	-	-	+
	IItpm5	-	38	IIpm9	46	-	-	+	-	+
	IItpm6	-	-	-	-	-	-	+	-	-
	IItpm7	-	-	-	-	-	-	-	-	-
	IItpm8	-	-	IIpm13?	-	-	-	-	-	-
	IItpm9	-	39	IIpm12, IIpm13?	47	85	37, 38	+	-	-
	IItpm10	+	-	IIpm7	48	-	-	+	-	?
	IItpm11	-	-	-	-	-	-	-	-	-
	IItpm12	-	-	-	-	-	-	-	-	-
	IIppm1	-	-	IIpm5d+e	-	-	-	+	+	-
	IIppm2	-	-	-	-	-	-	-	-	-
	IIspm1	-	-	IIpm14	49	97	39	+	-	+
	IIspm2	+	40	Iizm	50	86	40	+	+	+
	IIspm3	-	61	IIifm	-	-	-	+	+	+
	IIspm4	-	-	-	-	-	-	-	-	-
	IIspm5	-	-	-	-	-	-	-	-	+
	IIspm6	+	-	-	-	-	-	-	-	-
	IIspm7	+?	-	-	-	-	-	-	-	-
	IIspm8	-	-	-	-	-	-	-	-	-
	IIpcm1	+	53?	IIpm5b+c	61	98	51	+	?	-
	IIpcm2	+	42, 53	IIpm1, IIpm2	-	-	-	+	+	-
	IIpcm3	+	51, 52	IIpm4, IIpm5a	59, 60	94, 95	49, 50	+	-	+
	IIpcm4	+	(52)	(IIpm5a)	60	96	50	+	?	+
	IIpcm5	+	55	IIpm3	-	-	-	+	+	+
	IIpcm6	-	-	-	-	-	-	-	-	-
	IIvlm1	-	35	-	-	-	-	+	-	-
	IIvlm2	-	-	-	-	-	-	-	-	-
	IIvlm3	+	59	IIvlm4, IIvlm5	67	116	-	-	-	+
	IIvlm4	-	-	-	-	-	-	-	-	-
	IIvlm5	+	60	IIvlm3	68	117	-	+	+	+
	IIvlm6	-	-	-	-	-	-	-	-	-
	IIvlm7	-	-	-	-	-	-	-	-	-
	IIscm1	+ (2x)	44	IIbm1 (tripartite)	52	92	42	+	+	+
	IIscm2	-	-	IIbm2	-	-	-	+	+	-
	IIscm3	+	50	IIbm3, IIbm6	57	100	48	?	+	+
	IIscm4	+	49?	IIbm5	56?	101	47?	-	-	+
	IIscm5	+	48	IIbm7	-	93	46	-	-	+
	IIscm6	+	56	IIbm4	63	103d	54	-	-	+
	IIscm7	+	68	IIvlm2	81	-	-	-	-	+
METATHORAX	IIIdlm1	+	58	IIIdlm1	66	112	57, 58?	-	-	+
	IIIdlm2	-	-	IIIdlm1a, IIIdlm3, IIIdlm4	-	-	-	+	-	+
	IIIdvm1	-	-	-	71	113	60	-	-	-
	IIIdvm2	+	66	IIIdvm1, IIIdvm6	80	118	67	?	-	+
	IIIdvm3	-	-	-	-	-	-	+	-	?
	IIIdvm4	+	70	IIIdvm3, IIIdvm4	84, 85	119	70	+	+	-
	IIIdvm5	+	71	IIIdvm2	86	120	71	+	+	+
	IIIdvm6	+	72	IIIpm6	87	129	72	+	+	+
	IIIdvm7	+	79	IIIdvm5	95, 96	133b, 133c	79, 80	+	+	+
	IIIdvm8	-	-	IIIism	72	-	61	+	+	-
	IIItpm1	-	-	IIIpm10, IIIpm8?	73	-	-	?	-	+
	IIItpm2	-	62	IIIpm11	74	-	-	-	-	+
	IIItpm3	-	-	-	-	-	-	+	-	+
	IIItpm4	-	-	-	-	-	-	+	-	+
	IIItpm5	-	-	IIIpm9	75	-	-	+	-	+
	IIItpm6	-	-	-	-	-	-	+	-	-
	IIItpm7	-	-	-	-	-	-	-	-	-
	IIItpm8	-	-	-	-	-	-	-	-	-
	IIItpm9	-	63	IIIpm12	76	114	62, 63	+	-	-
	IIItpm10	+	64	IIIpm7	-	-	-	+	-	?
	IIItpm11	-	-	-	-	-	-	-	-	-
	IIItpm12	-	-	-	-	-	-	-	-	-
	IIIppm1	-	-	-	-	-	-	+	-	-
	IIIppm2	-	-	-	-	-	-	-	-	-
	IIIspm1	-	-	-	77, 78	127	64, 65	+	-	+
	IIIspm2	+	65	IIIzm	79	115	66	+	+	+
	IIIspm3	-	-	-	-	-	-	-	-	-
	IIIspm4	-	-	-	-	-	-	-	-	-
	IIIspm5	+	-	-	-	-	-	-	-	+
	IIIpcm1	+	78?	IIIpm5b	78	128	94	-	+	-
	IIIpcm2	+	67, 78	IIIpm1, IIIpm2	-	-	-	+	+	-
	IIIpcm3	+	76, 77	IIIpm4	76, 77	125	92, 93	+	-	+
	IIIpcm4	+	(77)	IIIpm5a	77	126	93	+	?	+
	IIIpcm5	+	80	IIIpm3	-	-	-	-	+	+
	IIIpcm6	-	-	-	-	-	-	-	-	-
	IIIpcm7	-	-	-	-	-	-	-	-	-
	IIIvlm1	-	-	-	70	-	59	+	-	-
	IIIvlm2	-	88	IIIvlm2-5	104	144	87	-	+	+
	IIIvlm3	-	85	IIIvlm1	103	143	86	-	-	-
	IIIscm1	+	69	IIIbm1	82, 83	121 (pair)	68, 69	+	+	+
	IIIscm2	+	73	IIIbm2	88	123, 124	73	+	+	-
	IIIscm3	+	75	IIIbm3	90, 91	130	75	?	+	+
	IIIscm4	+	74	IIIbm5	89	122	74	-	-	+
	IIIscm5	-	-	-	-	-	-	-	-	+
	IIIscm6	+	81	IIIbm4	97	133d	81	+	+	+
	(+)* muscle Ispm1 in Atractomorpha obsolete; furca and pleural arm are connected trough chitinous material
